# Supplementary material
Source: PubMed Central journal article supplement (PMC3924053)

Figure S1.

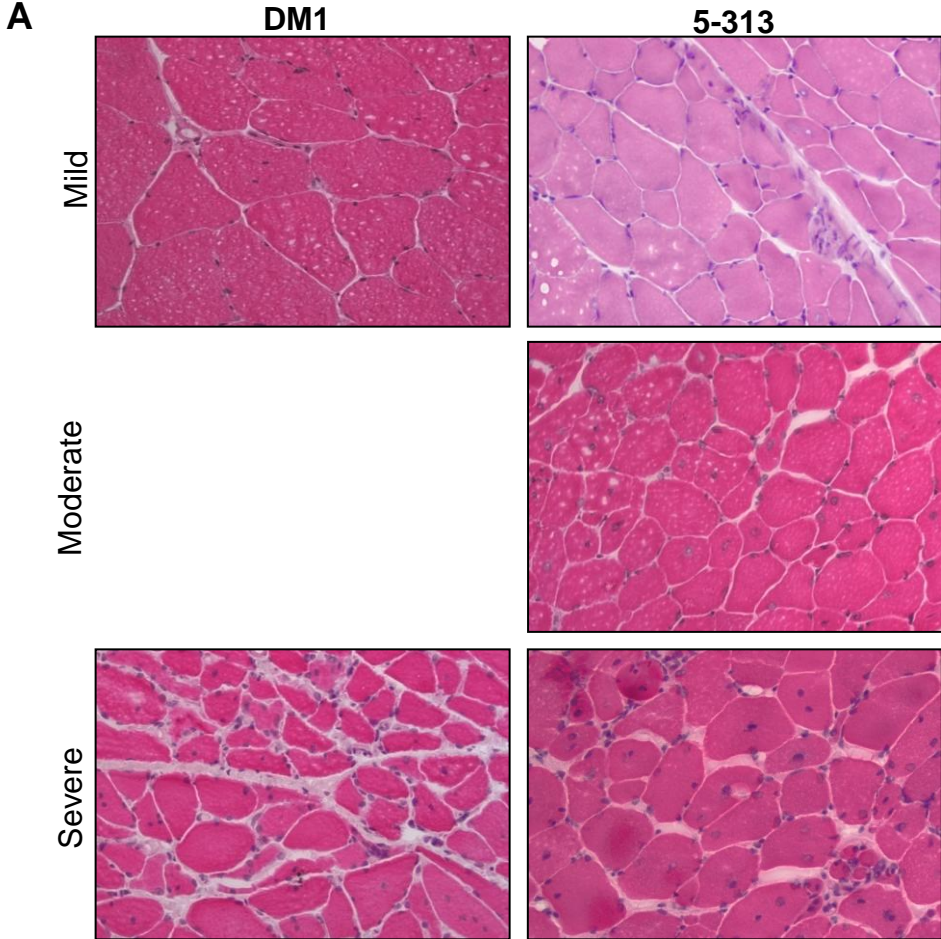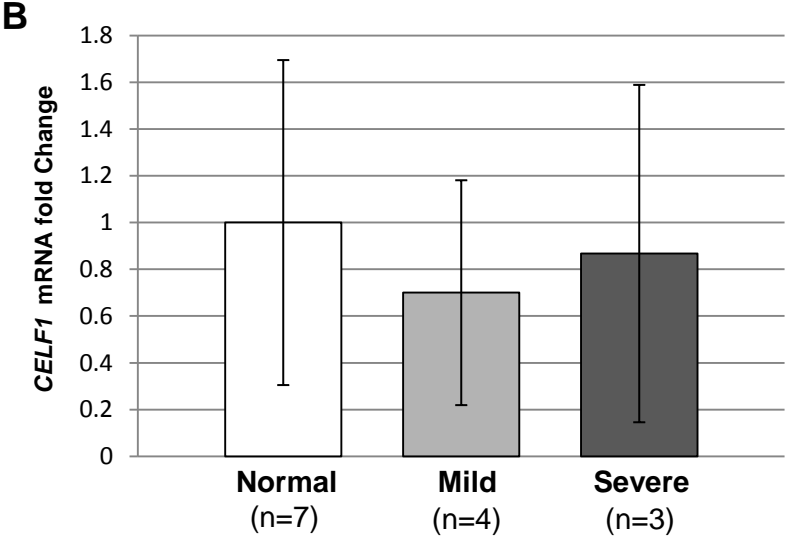

Figure S2.

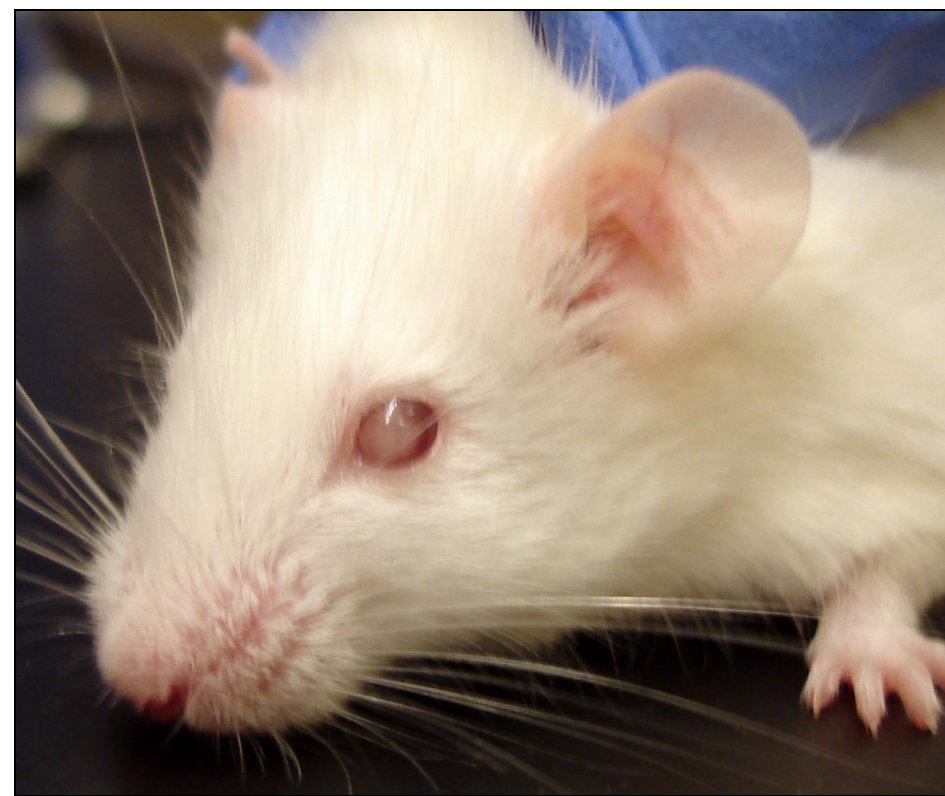

Figure S3.

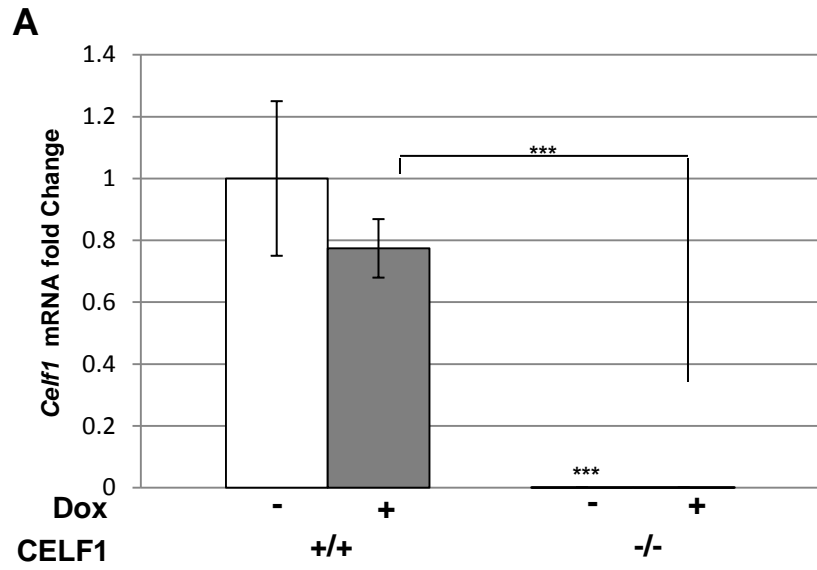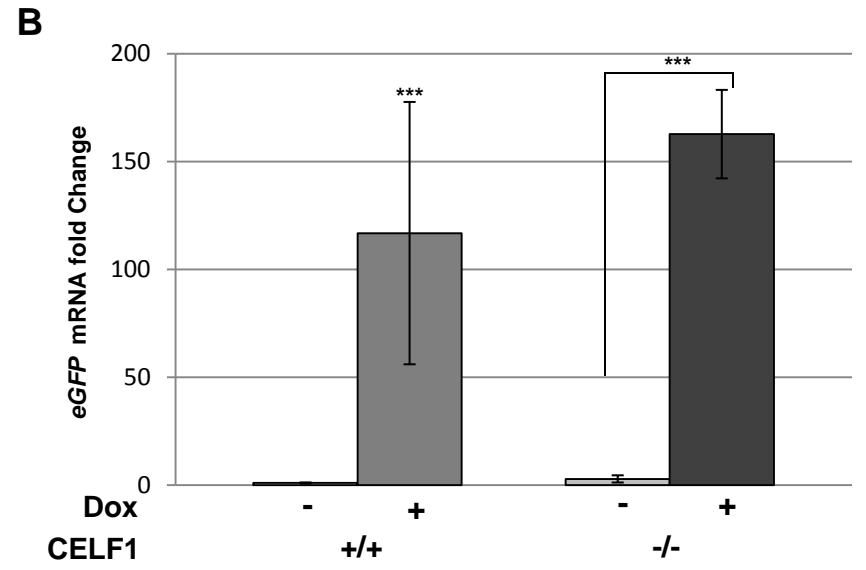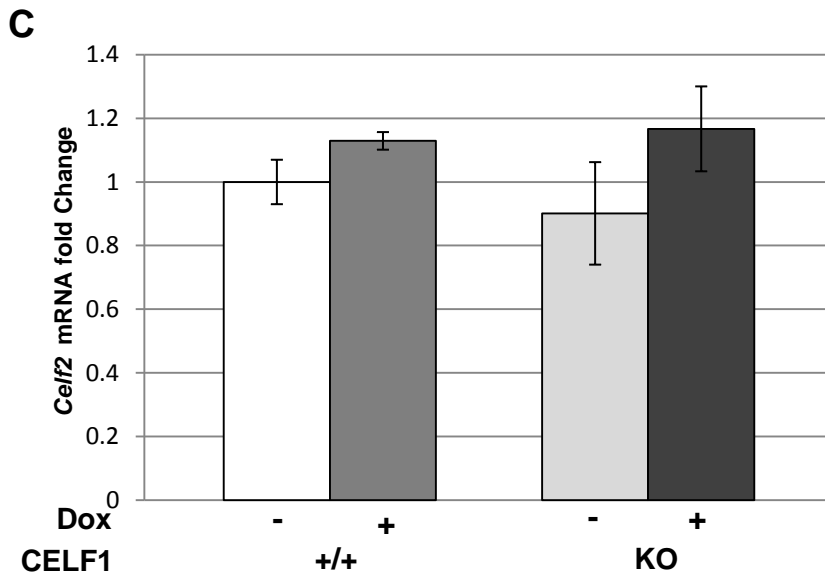

Figure S4.

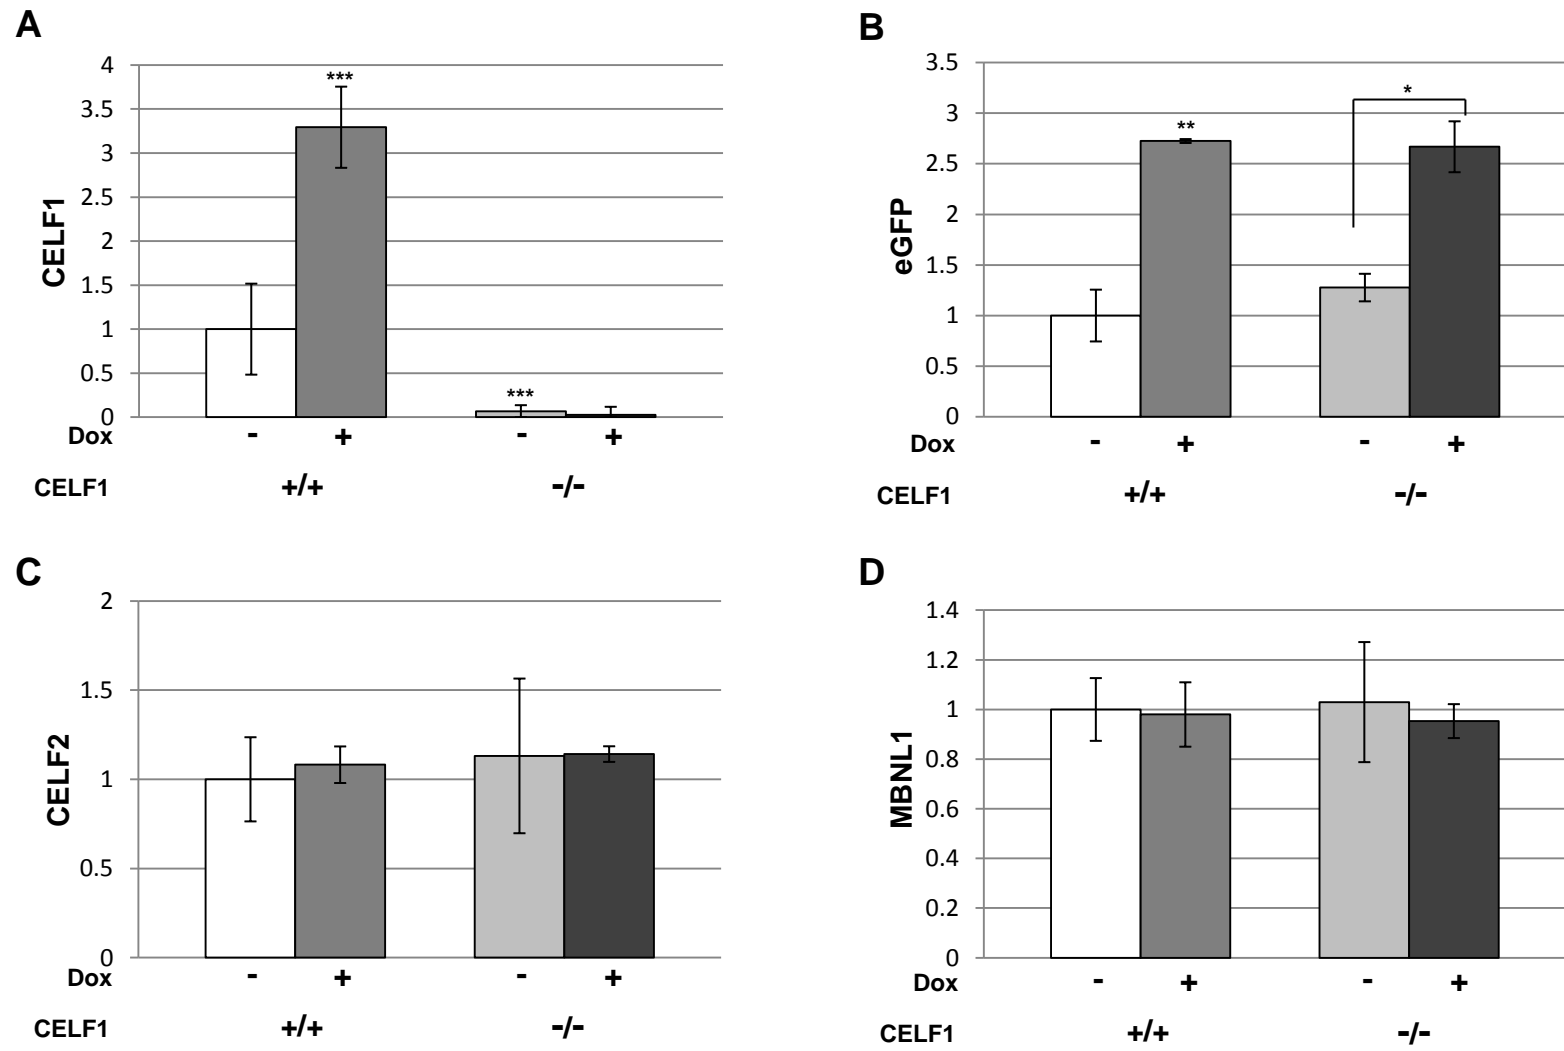

Figure S5.

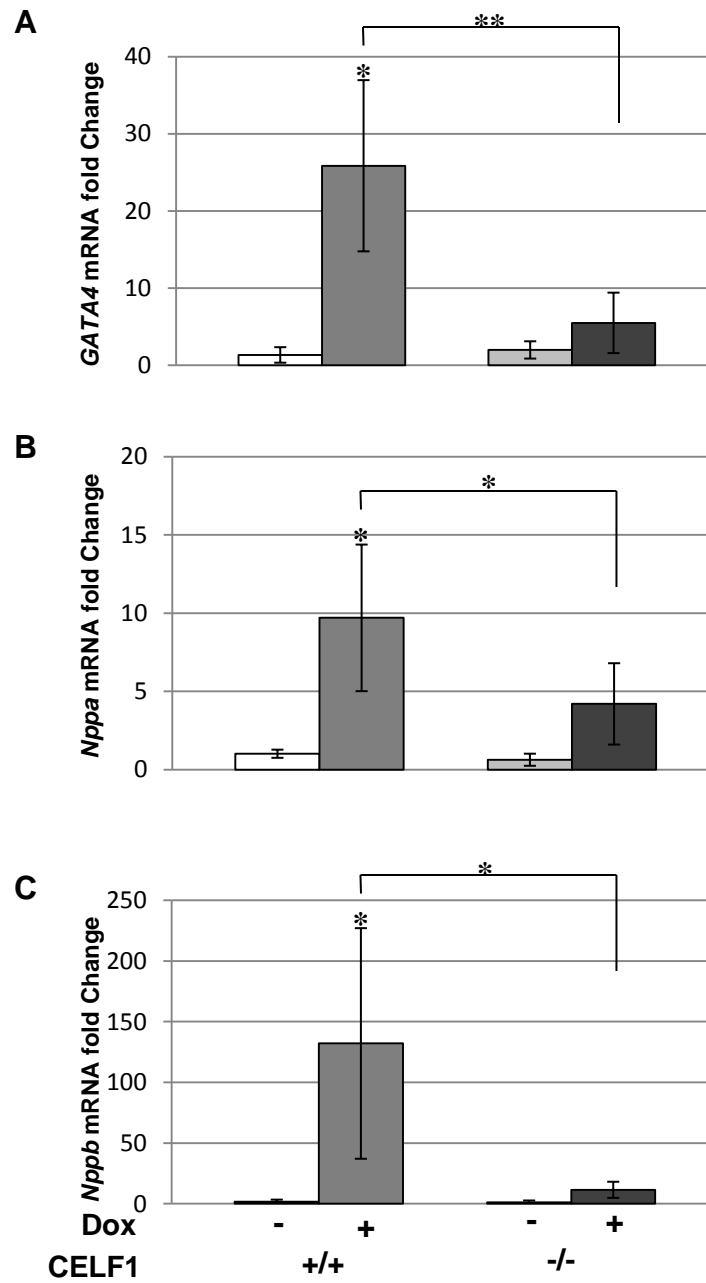

Supplement: supp_ddt419_ddt419supp_figs.pdf [file supp_ddt419_ddt419supp_figs.pdf]
